# Supplementary material for: Habitat and landscape factors influence pollinators in a tropical megacity, Bangkok, Thailand
Source: PubMed Central journal article supplement (PMC6055598; doi:10.7717/peerj.5335), 2018-07-20
Supplement: peerj-06-5335-s001.pdf [file peerj-06-5335-s001.pdf]

# **Habitat and landscape factors influence pollinators in a tropical megacity, Bangkok, Thailand**

**Supplemental Figure S1.** Maps of the study area.

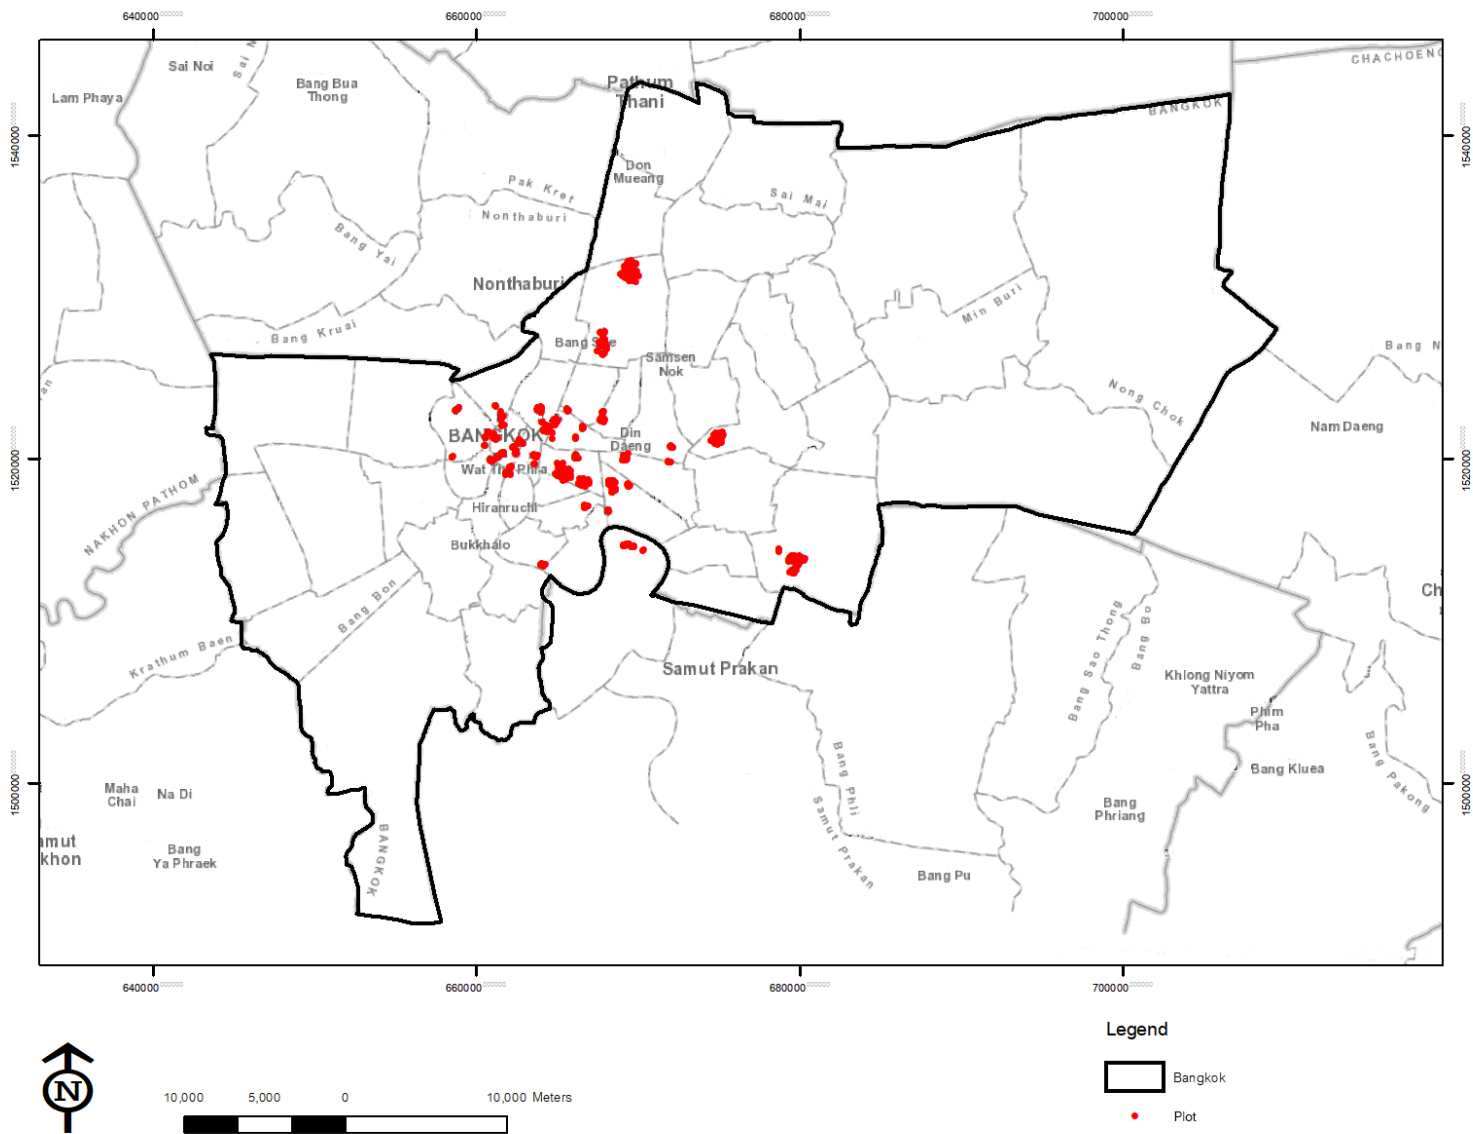

**Supplemental Figure S1a.** A map of Bangkok, Thailand, showing all 52 green areas used in the study.

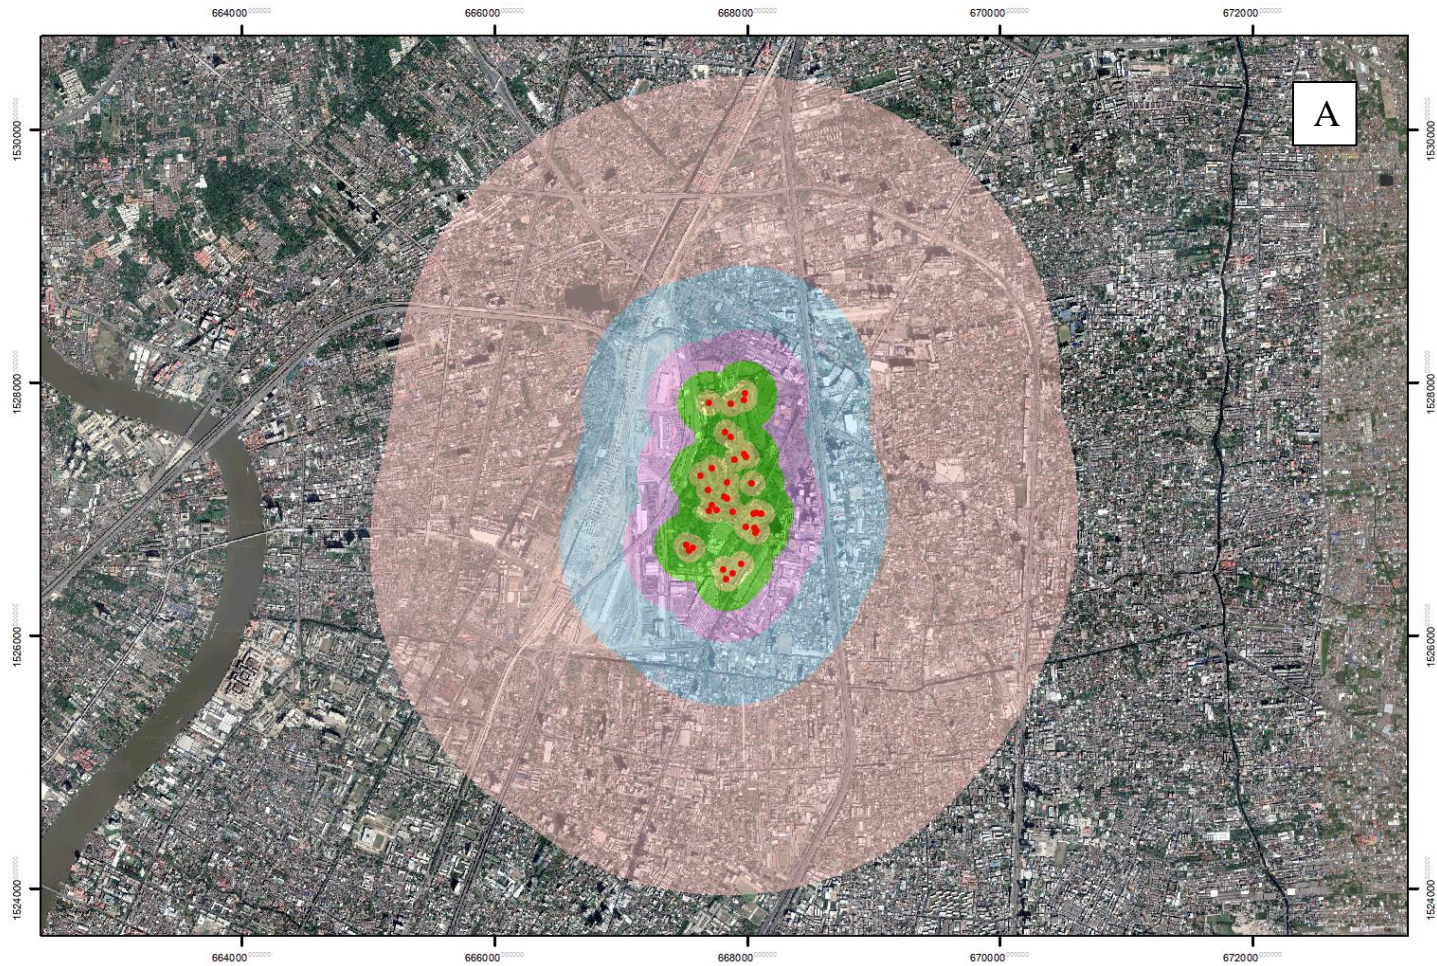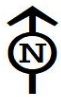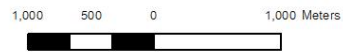

Legend

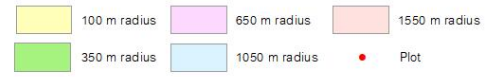



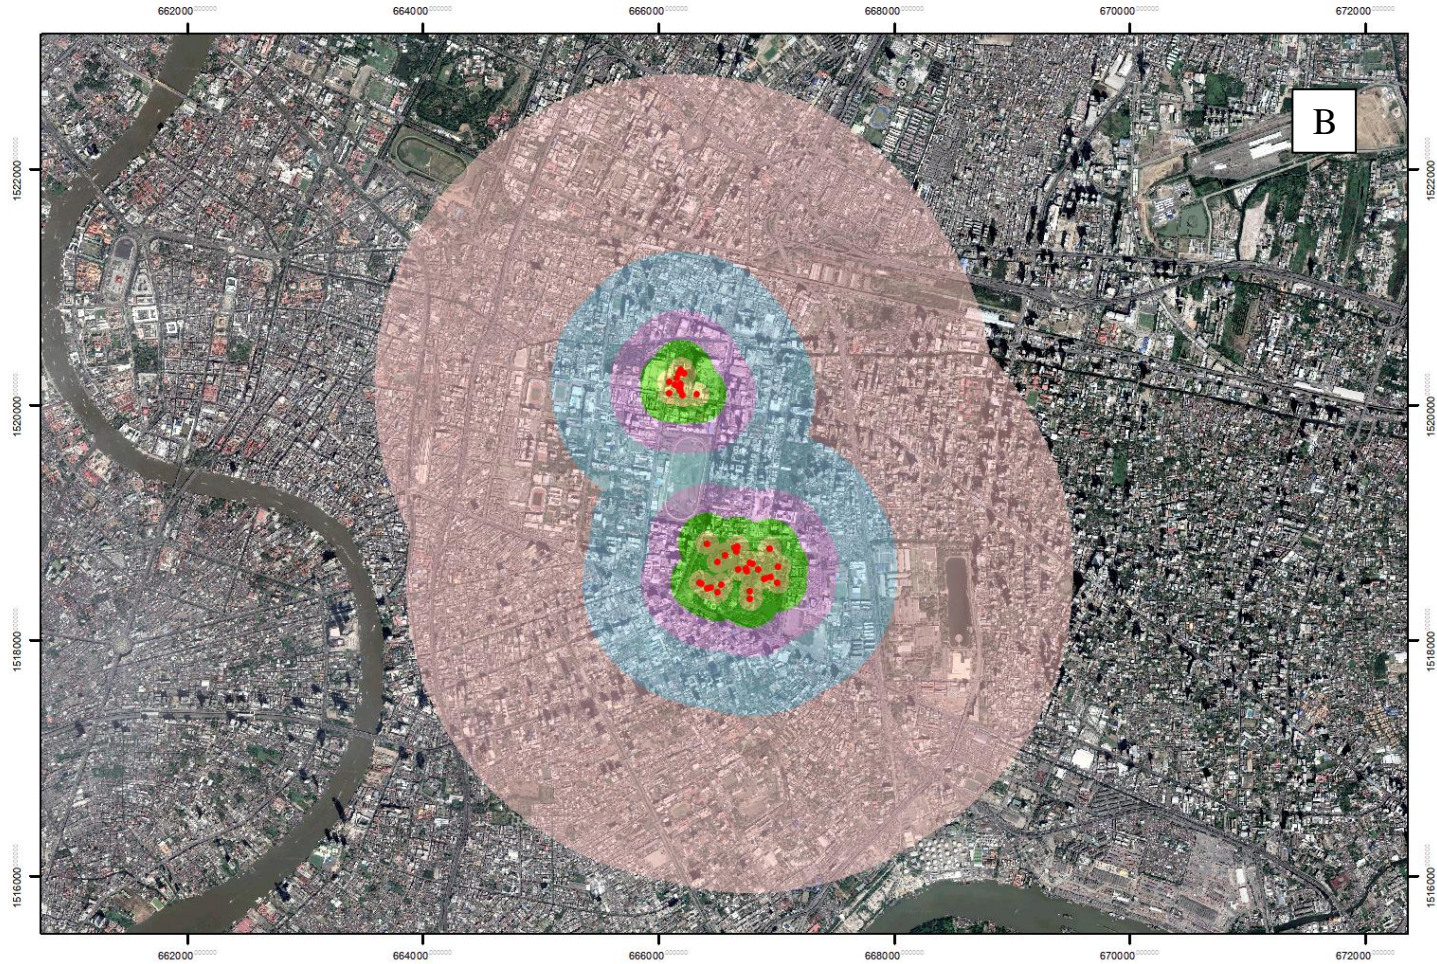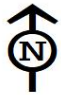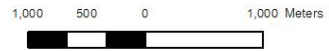

Legend





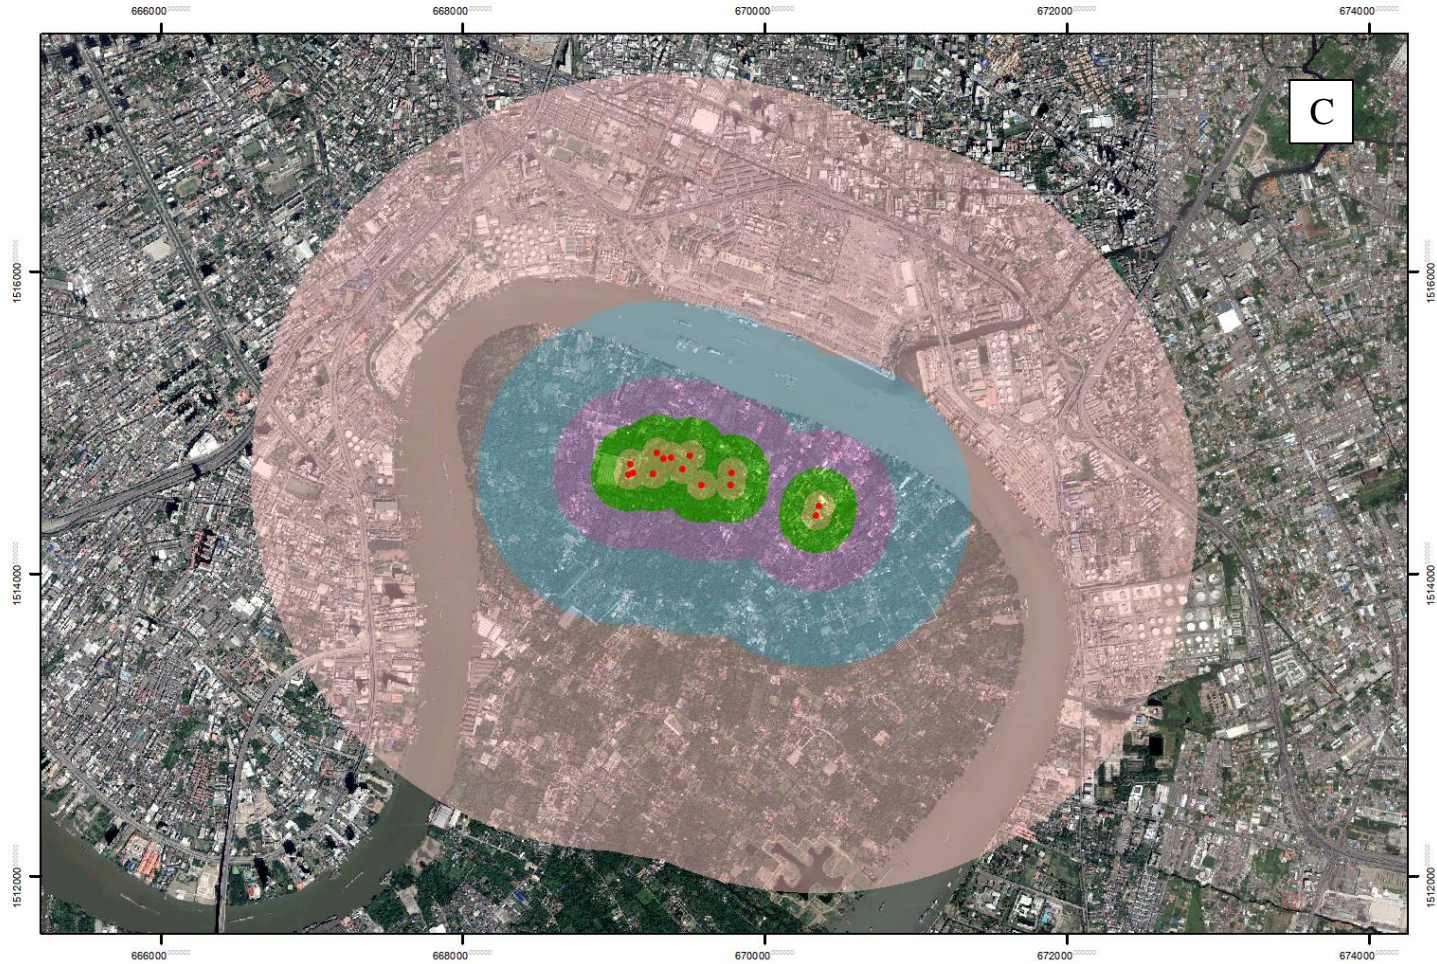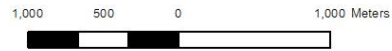

Legend





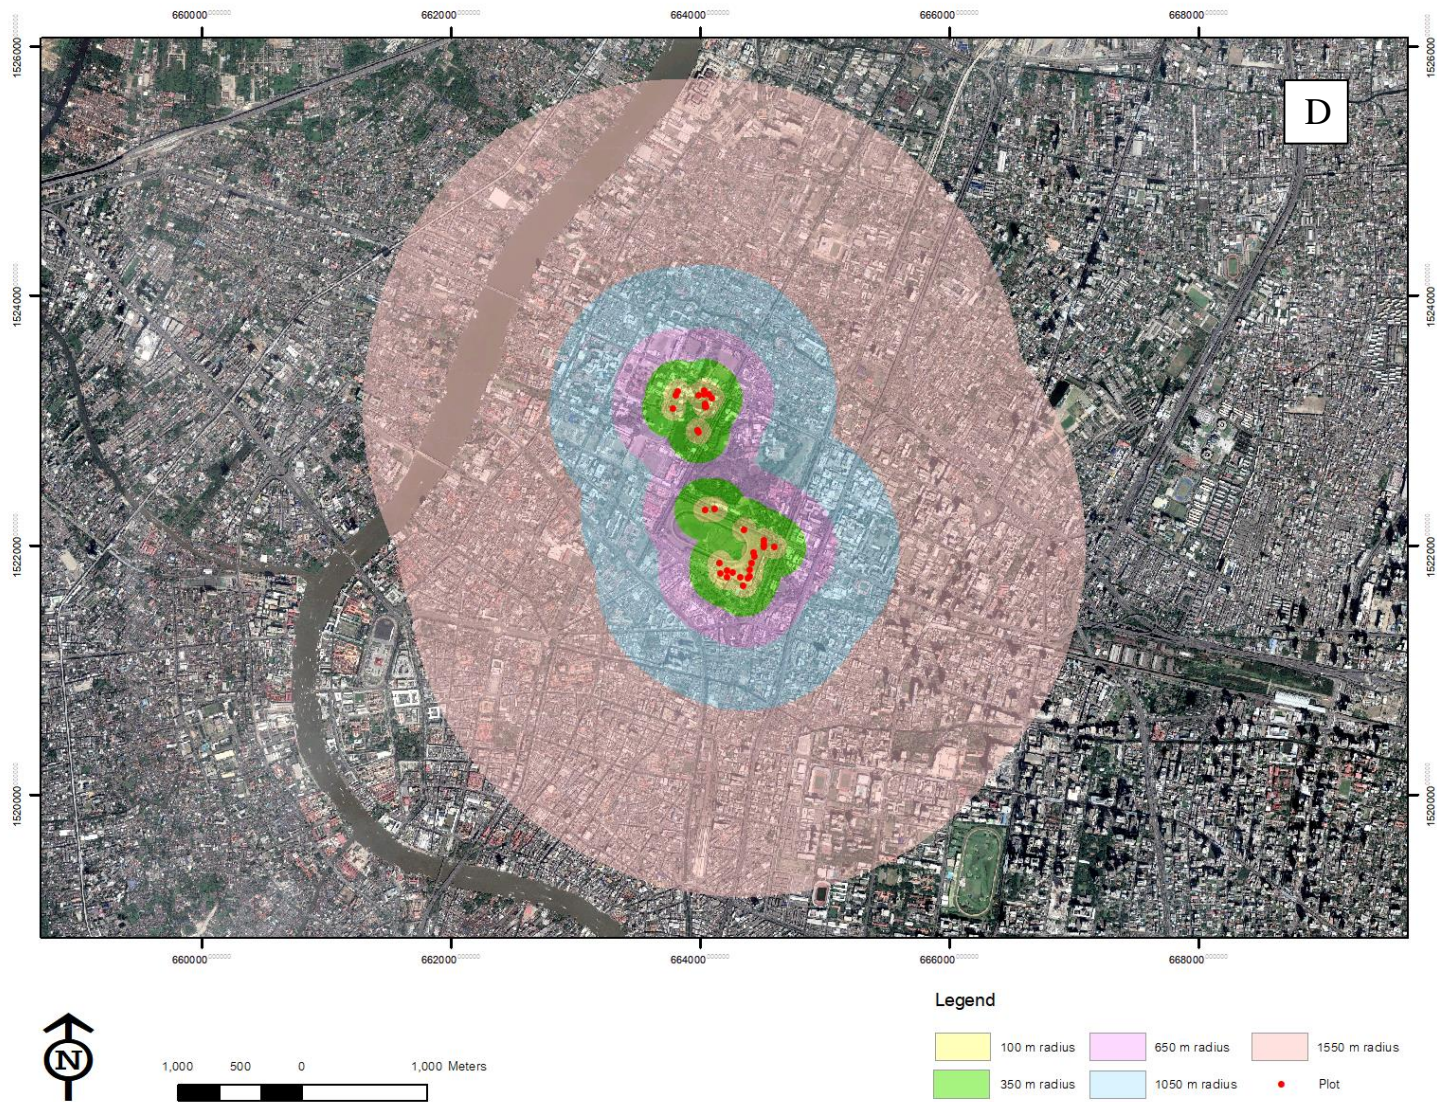

**Supplemental Figure S1b.** Representative samples of how we measured percent vegetation surrounding each plot within 5 concentric circles (yellow, 100 m; green, 350 m; purple, 650 m; blue, 1,050 m; and pink 1,550 m radiuses). Top to bottom: (A) Suan Wachirabenchatat, (B) Wat Pathum Wanaram and Suan Lumpini, (C) Suan Sri Nakhon Khuean Khan (left) and School Sumran Wittaya (right), and (D) Dusit Zoo and Dusit Golf Course.
