# Supplementary material for: Habitat and landscape factors influence pollinators in a tropical megacity, Bangkok, Thailand
Source: PubMed Central journal article supplement (PMC6055598; doi:10.7717/peerj.5335), 2018-07-20

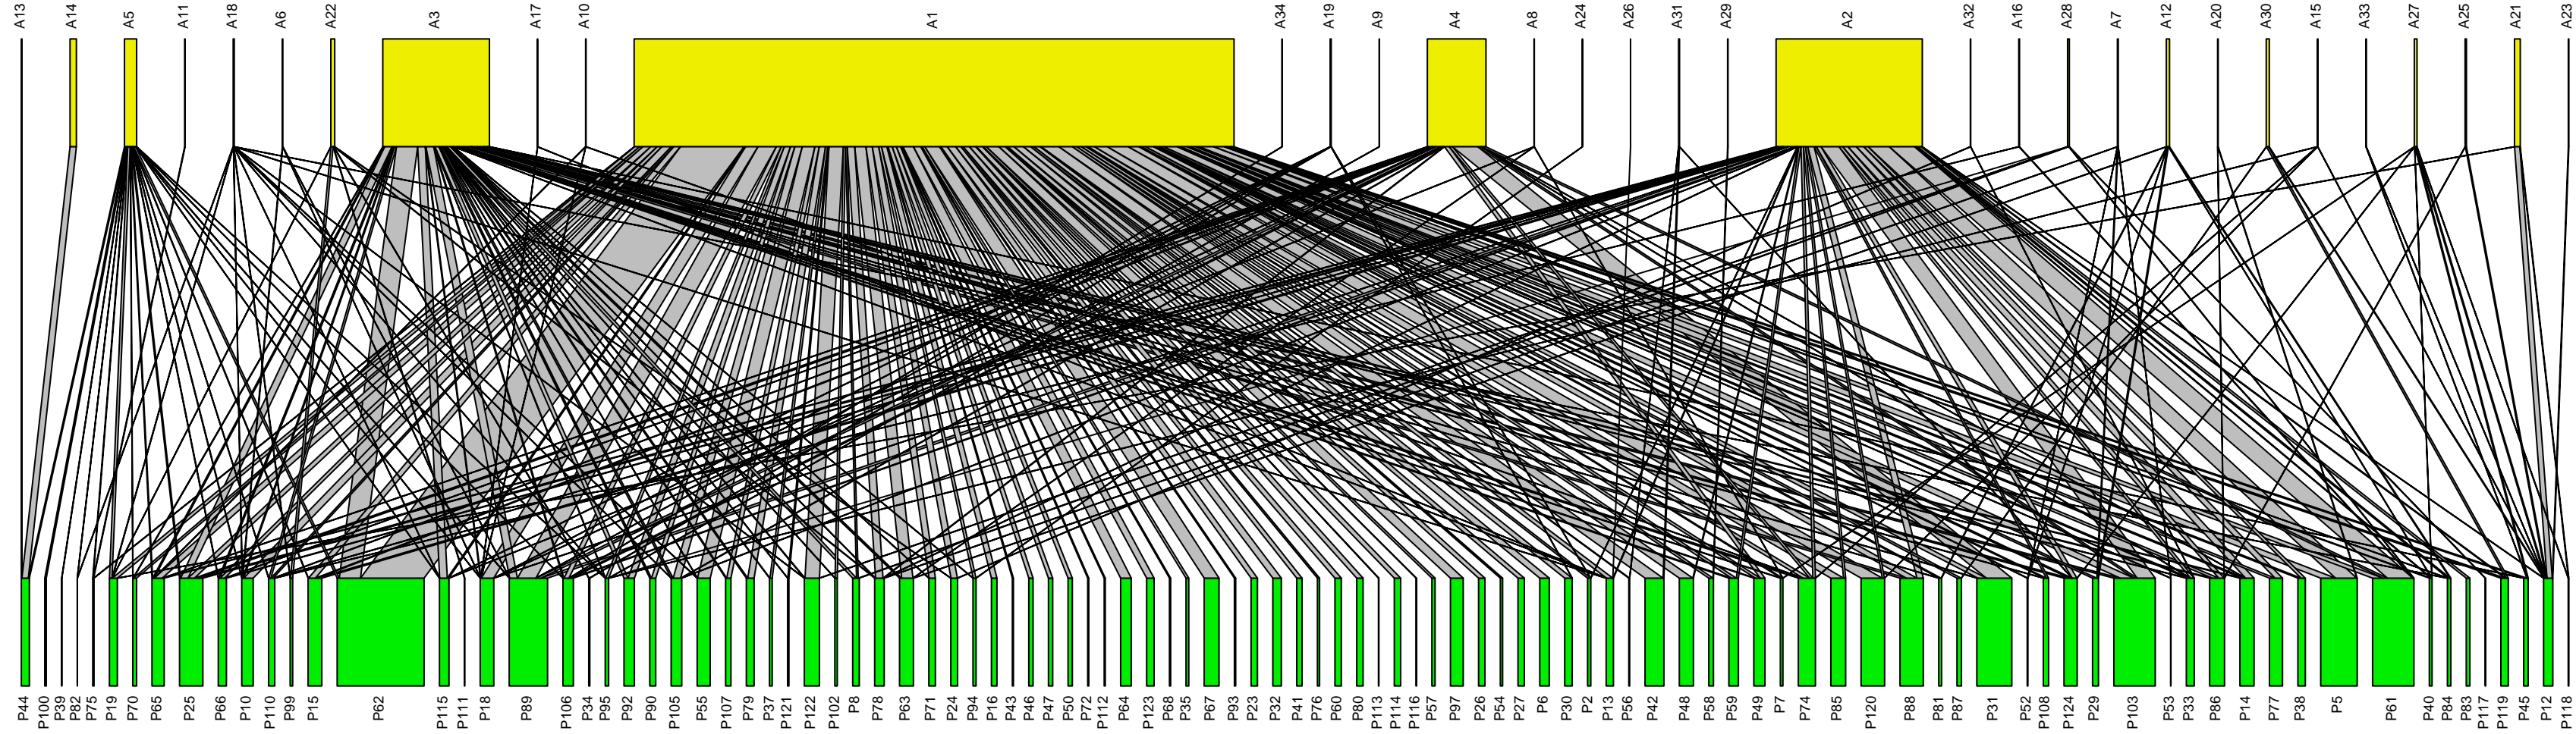

Supplement: peerj-06-5335-s003.pdf [file peerj-06-5335-s003.pdf]
