# Supplementary material for: Habitat and landscape factors influence pollinators in a tropical megacity, Bangkok, Thailand
Source: PubMed Central journal article supplement (PMC6055598; doi:10.7717/peerj.5335), 2018-07-20
Supplement: peerj-06-5335-s004.pdf [file peerj-06-5335-s004.pdf]

## Habitat and landscape factors influence pollinators in a tropical megacity, Bangkok, Thailand

**Supplemental Table S1.** Descriptive information about the 52 green areas used in this study. Green areas were categorized as either public parks, schools, temples, or commercial areas. Patch size refers to land area only (the areas of large bodies of water were subtracted from the total area). The number of plots conducted per green area was approximately proportional to the size of the green area. Floral abundance refers to the average number of flowers per plot. Pollinator richness and abundance indicate the number of pollinator species and pollinator individuals, respectively, averaged across all plots within each green area.

|                                                 | Green Area                                                        | Patch Size (m <sup>2</sup> ) | # of Plots | Floral Abundance | Pollinator Richness | Pollinator Abundance |
|-------------------------------------------------|-------------------------------------------------------------------|------------------------------|------------|------------------|---------------------|----------------------|
| Public Parks                                    | Suan Wachirabenchatat                                             | 1,097,600                    | 36         | 594.36           | 1.72                | 0.23                 |
|                                                 | Suan Luang R.9                                                    | 741,000                      | 29         | 153.66           | 2.38                | 1.57                 |
|                                                 | Suan Lumpini                                                      | 576,000                      | 26         | 161.31           | 1.50                | 1.90                 |
|                                                 | Suan Sri Nakhon Khuean Khan                                       | 115,000                      | 12         | 126.25           | 0.50                | 1.30                 |
|                                                 | Suan Benjakitti 1                                                 | 108,000                      | 11         | 241.55           | 1.82                | 0.69                 |
|                                                 | Suan Rama 8                                                       | 80,400                       | 10         | 172.00           | 1.00                | 0.07                 |
|                                                 | Suan Benjakitti 2                                                 | 66,000                       | 8          | 224.25           | 0.88                | 0.30                 |
|                                                 | Public Park in Commemoration of H.M. the Kings 6th Cycle Birthday | 52,000                       | 8          | 25.50            | 1.13                | 0.76                 |
|                                                 | Statue King Rama 1 Park                                           | 50,000                       | 8          | 145.00           | 0.88                | 0.06                 |
|                                                 | Suan Rommaninat                                                   | 47,888                       | 8          | 366.50           | 1.25                | 0.16                 |
|                                                 | Suan Benjasiri                                                    | 46,400                       | 8          | 257.63           | 1.13                | 1.25                 |
|                                                 | Suan Saranrom                                                     | 36,800                       | 7          | 53.43            | 1.29                | 3.22                 |
|                                                 | Suan Somdet Saranrat Maneerom                                     | 34,500                       | 6          | 245.00           | 1.83                | 0.60                 |
|                                                 | Suan Santiphap                                                    | 32,000                       | 6          | 84.33            | 0.83                | 0.21                 |
|                                                 | Suan Chaloemprakiat 80 Punsaporn Thek Thung                       | 31,100                       | 6          | 97.00            | 1.67                | 1.46                 |
|                                                 | Suan Chalermprakiat 80 years                                      | 27,200                       | 6          | 110.50           | 1.67                | 0.90                 |
|                                                 | Suan Phaya Thai Pirom                                             | 28,600                       | 5          | 460.00           | 1.60                | 0.34                 |
|                                                 | Suan Vibhavadi Rangsit Forest Park                                | 23,300                       | 5          | 140.00           | 0.80                | 0.20                 |
|                                                 | Suan Phan Phirom                                                  | 22,400                       | 5          | 339.00           | 1.80                | 0.28                 |
|                                                 | Suan Chaloem Phrakiat Forest Park                                 | 20,500                       | 5          | 211.00           | 2.60                | 0.37                 |
| Suan Santichai Prakan                           | 13,600                                                            | 4                            | 181.00     | 1.50             | 0.29                |                      |
| Suan Princess Mothers Commemoration Public Park | 12,900                                                            | 4                            | 42.50      | 1.75             | 0.54                |                      |

|                         | <b>Green Area</b>                  | <b>Patch Size (m<sup>2</sup>)</b> | <b># of Plots</b> | <b>Floral Abundance</b> | <b>Pollinator Richness</b> | <b>Pollinator Abundance</b> |
|-------------------------|------------------------------------|-----------------------------------|-------------------|-------------------------|----------------------------|-----------------------------|
|                         | Suan Pakkard Palace                | 9,600                             | 4                 | 26.50                   | 1.25                       | 0.30                        |
|                         | Suan Serene Garden Mithra          | 4,864                             | 4                 | 161.00                  | 1.50                       | 1.50                        |
|                         | Princess Mother Memorial Park      | 7,920                             | 3                 | 343.33                  | 1.67                       | 0.08                        |
|                         | Suan Charanphirom                  | 4,800                             | 3                 | 225.00                  | 2.67                       | 0.50                        |
|                         | Suan Sra Keaw Community            | 968                               | 2                 | 600.00                  | 1.00                       | 0.03                        |
| <b>Schools</b>          | Kasetsart University               | 1,140,000                         | 36                | 385.17                  | 2.50                       | 0.67                        |
|                         | Chulalongkorn University           | 824,000                           | 30                | 84.90                   | 2.37                       | 0.72                        |
|                         | Ramkhamhaeng University            | 467,000                           | 23                | 250.83                  | 2.04                       | 0.93                        |
|                         | Thai Japanese Bangkok Youth Center | 114,000                           | 11                | 96.36                   | 1.64                       | 0.30                        |
|                         | Srinakharinwirot University        | 112,000                           | 11                | 116.82                  | 1.73                       | 0.78                        |
|                         | Thammasat University Tha Prachan   | 81,300                            | 10                | 352.80                  | 2.70                       | 1.79                        |
|                         | Mahidol University                 | 64,700                            | 9                 | 101.56                  | 1.00                       | 0.30                        |
|                         | School Sumran Wittaya              | 1,000                             | 2                 | 1515.00                 | 2.00                       | 0.67                        |
|                         | Thai Women Association School      | 600                               | 1                 | 4.00                    | 1.00                       | 0.75                        |
| <b>Temples</b>          | Wat Pho                            | 54,000                            | 8                 | 264.00                  | 2.25                       | 0.34                        |
|                         | Wat Pathum Wanaram                 | 26,700                            | 8                 | 44.38                   | 0.75                       | 0.20                        |
|                         | Wat Arun                           | 21,400                            | 8                 | 41.25                   | 1.25                       | 2.95                        |
|                         | Wat Thepsirin                      | 43,900                            | 7                 | 175.71                  | 0.86                       | 0.10                        |
|                         | Wat Saket                          | 12,600                            | 4                 | 202.50                  | 0.75                       | 0.98                        |
|                         | Wat Suthat                         | 8,600                             | 4                 | 353.25                  | 1.75                       | 1.76                        |
|                         | Wat Rakang                         | 10,900                            | 3                 | 0.67                    | 0.33                       | 2.67                        |
|                         | Wat Thepthidaram                   | 6,700                             | 3                 | 334.00                  | 0.67                       | 0.70                        |
| <b>Commercial Areas</b> | Dusit Golf Course                  | 343,000                           | 20                | 51.65                   | 1.05                       | 0.47                        |
|                         | Dusit Zoo                          | 167,000                           | 14                | 293.21                  | 1.29                       | 0.30                        |
|                         | Par 3 Srinakarin Golf              | 10,000                            | 3                 | 61.67                   | 1.33                       | 0.54                        |
|                         | Royal Pavilion Mahajetsadabadin    | 6,020                             | 3                 | 161.33                  | 2.33                       | 0.50                        |
|                         | Royal Railway Station              | 5,472                             | 3                 | 145.67                  | 2.67                       | 1.03                        |
|                         | Lan Pra Ratcha Nu Saowaree         | 4,700                             | 3                 | 34.00                   | 0.67                       | 1.68                        |
|                         | Siriraj Hospital                   | 4,470                             | 3                 | 25.00                   | 0.67                       | 0.47                        |
|                         | Wong Wian 22                       | 4,430                             | 3                 | 30.00                   | 1.33                       | 0.24                        |
