# Supplementary material for: Habitat and landscape factors influence pollinators in a tropical megacity, Bangkok, Thailand
Source: PubMed Central journal article supplement (PMC6055598; doi:10.7717/peerj.5335), 2018-07-20
Supplement: peerj-06-5335-s005.pdf [file peerj-06-5335-s005.pdf]

## Habitat and landscape factors influence pollinators in a tropical megacity, Bangkok, Thailand

**Supplemental Table S2.** Detailed information about the 140 plant taxa observed in this study. Taxa are sorted alphabetically by family and then species name. Frequency refers to the number of 2x2 m plots in which each plant taxa was encountered. Pollinator richness and pollinator abundance indicate the average number of pollinator species and pollinator individuals, respectively, recorded at each plant taxa during the 15-minute observation period. We do not have pollinator richness and abundance values for some plant taxa (“NA”) because they only occurred in plots with other plant species, and we did not separate the pollinator data by plant species in multi-species plots. Therefore, we only have pollinator richness and abundance values for plant taxa that were observed in a single-species plot at least once. Distribution information was obtained from the Catalogue of Life website (<http://www.catalogueoflife.org>; accessed May 2018): native – listed as native in Thailand or Southeast Asia; exotic – listed as introduced in Thailand or Southeast Asia; unclear – distribution data is not clear (e.g., listed as native in certain neighboring countries, but no information reported for Thailand); no info – no distribution information listed at all. For the columns with numeric information, the five highest values are highlighted in yellow (Frequency), blue (Pollinator Richness), and pink (Pollinator Abundance).

| Family         | Plant Species                                         | Frequency<br>(# of plots) | Pollinator<br>Richness | Pollinator<br>Abundance | Distribution |
|----------------|-------------------------------------------------------|---------------------------|------------------------|-------------------------|--------------|
| Acanthaceae    | <i>Asystasia gangetica</i> (L.) T.Anderson            | 8                         | 1.50                   | 0.27                    | native       |
|                | <i>Crossandra nilotica</i> Oliv.                      | 1                         | 0.00                   | 0.00                    | exotic       |
|                | <i>Graptophyllum pictum</i> (L.) Griff.               | 1                         | 1.00                   | 0.25                    | exotic       |
|                | <i>Hygrophila erecta</i> (Burm.f.) Hochr.             | 4                         | 1.25                   | 0.26                    | exotic       |
|                | <i>Justicia betonica</i> L.                           | 1                         | 5.00                   | 0.13                    | exotic       |
|                | <i>Pseuderanthemum curtatum</i> (C. B. Cl.) Merrill   | 3                         | 0.67                   | 0.08                    | unclear      |
|                | <i>Ruellia simplex</i> C.Wright                       | 46                        | 1.32                   | 0.38                    | exotic       |
|                | <i>Thunbergia grandiflora</i> (Roxb. ex Rottl.) Roxb. | 1                         | 1.00                   | 1.00                    | unclear      |
|                | <i>Thunbergia laurifolia</i> Lindl.                   | 1                         | 1.00                   | 1.20                    | unclear      |
| Alismataceae   | <i>Echinodorus cordifolius</i> (L.) Griseb.           | 6                         | 2.00                   | 0.47                    | exotic       |
| Amaranthaceae  | <i>Amaranthus viridis</i> L.                          | 1                         | 3.00                   | 0.09                    | exotic       |
|                | <i>Gomphrena celosioides</i> Mart.                    | 4                         | 1.67                   | 0.23                    | exotic       |
|                | <i>Gomphrena globosa</i> L.                           | 1                         | 1.00                   | 0.57                    | native       |
| Amaryllidaceae | <i>Crinum asiaticum</i> L.                            | 6                         | 0.80                   | 2.62                    | native       |

| Family        | Plant Species                                                   | Frequency<br>(# of plots) | Pollinator<br>Richness | Pollinator<br>Abundance | Distribution |
|---------------|-----------------------------------------------------------------|---------------------------|------------------------|-------------------------|--------------|
|               | <i>Hymenocallis littoralis</i> (Jacq.) Salisb.                  | 2                         | 1.00                   | 0.14                    | no info      |
|               | <i>Zephyranthes minuta</i> (Kunth) D.Dietr.                     | 1                         | 1.00                   | 1.40                    | exotic       |
| Anacardiaceae | <i>Mangifera indica</i> L.                                      | 1                         | 1.00                   | 0.04                    | native       |
| Apocynaceae   | <i>Adenium obesum</i> (Forssk.) Roem. & Schult.                 | 1                         | 0.00                   | 0.00                    | exotic       |
|               | <i>Allamanda cathartica</i> L.                                  | 3                         | 0.00                   | 0.00                    | exotic       |
|               | <i>Cascabela thevetia</i> (L.) Lippold                          | 1                         | 0.00                   | 0.00                    | exotic       |
|               | <i>Catharanthus roseus</i> (L.) G.Don                           | 2                         | 0.00                   | 0.00                    | exotic       |
|               | <i>Cerbera odollam</i> Gaertn.                                  | 1                         | 0.00                   | 0.00                    | native       |
|               | <i>Marsdenia floribunda</i> (Brongn.) Schltr.                   | 1                         | 0.00                   | 0.00                    | exotic       |
|               | <i>Nerium oleander</i> L.                                       | 7                         | 0.29                   | 0.02                    | exotic       |
|               | <i>Plumeria</i> spp.                                            | 8                         | 0.00                   | 0.00                    | exotic       |
|               | <i>Tabernaemontana pandacaqui</i> Lam.                          | 2                         | NA                     | NA                      | native       |
|               | <i>Vallaris glabra</i> (L.) Kuntze                              | 1                         | NA                     | NA                      | unclear      |
|               | <i>Wrightia religiosa</i> (Teijsm. & Binn.) Benth. ex Kurz      | 19                        | 0.72                   | 0.17                    | unclear      |
| Bignoniaceae  | <i>Handroanthus chrysanthus</i> (Jacq.) S.O.Grose               | 2                         | 2.00                   | 0.66                    | exotic       |
|               | <i>Jacaranda</i> sp.                                            | 1                         | NA                     | NA                      | exotic       |
|               | <i>Podranea ricasoliana</i> (Tanfani) Sprague                   | 1                         | NA                     | NA                      | exotic       |
|               | <i>Spathodea campanulata</i> P.Beauv.                           | 2                         | 1.50                   | 0.43                    | exotic       |
|               | <i>Tabebuia aurea</i> (Silva Manso) Benth. & Hook.f. ex S.Moore | 8                         | 1.63                   | 0.40                    | exotic       |
|               | <i>Tabebuia rosea</i> (Bertol.) Bertero ex A.DC.                | 16                        | 2.53                   | 0.83                    | exotic       |
|               | <i>Tecoma stans</i> (L.) Juss. ex Kunth                         | 8                         | 2.00                   | 0.39                    | exotic       |
| Boraginaceae  | <i>Cordia alba</i> (Jacq.) Roem. & Schult.                      | 1                         | 3.00                   | 0.83                    | exotic       |
|               | <i>Cordia sebestena</i> L.                                      | 1                         | 1.00                   | 0.29                    | exotic       |
|               | <i>Ehretia microphylla</i> Lam.                                 | 1                         | 1.00                   | 0.63                    | native       |
| Cannaceae     | <i>Canna indica</i> L.                                          | 2                         | 1.00                   | 3.46                    | exotic       |
| Capparaceae   | <i>Crateva religiosa</i> G.Forst.                               | 1                         | 2.00                   | 0.01                    | native       |
| Cleomaceae    | <i>Cleome spinosa</i> Jacq.                                     | 1                         | 1.00                   | 0.04                    | exotic       |
| Clusiaceae    | <i>Calophyllum inophyllum</i> L.                                | 3                         | 3.50                   | 1.40                    | native       |

| Family         | Plant Species                                       | Frequency<br>(# of plots) | Pollinator<br>Richness | Pollinator<br>Abundance | Distribution |
|----------------|-----------------------------------------------------|---------------------------|------------------------|-------------------------|--------------|
| Combretaceae   | <i>Combretum indicum</i> (L.) DeFilipps             | 3                         | 1.00                   | 0.03                    | native       |
| Compositae     | <i>Cosmos sulphureus</i> Cav.                       | 1                         | NA                     | NA                      | exotic       |
|                | <i>Cyanthillium cinereum</i> (L.) H.Rob.            | 1                         | NA                     | NA                      | native       |
|                | <i>Emilia sonchifolia</i> (L.) DC. ex DC.           | 1                         | NA                     | NA                      | native       |
|                | <i>Helianthus annuus</i> L.                         | 1                         | 1.00                   | 2.50                    | exotic       |
|                | <i>Pluchea indica</i> (L.) Less.                    | 1                         | 2.00                   | 0.08                    | native       |
|                | <i>Tagetes erecta</i> L.                            | 4                         | 2.00                   | 0.93                    | exotic       |
|                | <i>Tridax procumbens</i> (L.) L.                    | 3                         | NA                     | NA                      | exotic       |
| Convolvulaceae | <i>Evolvulus nummularius</i> (L.) L.                | 1                         | NA                     | NA                      | exotic       |
|                | <i>Ipomoea aquatica</i> Forssk.                     | 5                         | 0.75                   | 2.37                    | native       |
|                | <i>Ipomoea carnea</i> Jacq.                         | 2                         | 1.50                   | 0.88                    | no info      |
| Costaceae      | <i>Cheilocostus speciosus</i> (J.Koenig) C.D.Specht | 1                         | 1.00                   | 0.50                    | native       |
| Cucurbitaceae  | <i>Coccinia grandis</i> (L.) Voigt                  | 4                         | 2.50                   | 2.94                    | native       |
|                | <i>Luffa cylindrica</i> (L.) M.Roem.                | 1                         | 3.00                   | 4.50                    | exotic       |
| Euphorbiaceae  | <i>Jatropha integerrima</i> Jacq.                   | 4                         | 2.00                   | 1.55                    | exotic       |
|                | <i>Jatropha multifida</i> L.                        | 1                         | 1.00                   | 0.12                    | exotic       |
| Lamiaceae      | <i>Clerodendrum x speciosum</i>                     | 1                         | 1.00                   | 0.09                    | exotic       |
|                | <i>Ocimum × africanum</i> Lour.                     | 2                         | 2.00                   | 0.23                    | native       |
|                | <i>Ocimum basilicum</i> L.                          | 5                         | 3.00                   | 0.50                    | native       |
|                | <i>Ocimum tenuiflorum</i> L.                        | 2                         | 2.00                   | 0.03                    | native       |
|                | <i>Salvia farinacea</i> Benth.                      | 1                         | 1.00                   | 0.30                    | exotic       |
|                | <i>Vitex negundo</i> L.                             | 1                         | 3.00                   | 0.20                    | native       |
| Lecythidaceae  | <i>Couropita guianensis</i> Aubl.                   | 7                         | 2.14                   | 1.76                    | exotic       |
|                | <i>Gustavia gracillima</i> Miers                    | 2                         | 1.50                   | 22.17                   | exotic       |
| Leguminosae    | <i>Albizia saman</i> (Jacq.) Merr.                  | 11                        | 1.00                   | 0.14                    | no info      |
|                | <i>Bauhinia acuminata</i> L.                        | 1                         | 0.00                   | 0.00                    | exotic       |
|                | <i>Bauhinia purpurea</i> L.                         | 5                         | 2.00                   | 0.75                    | exotic       |
|                | <i>Caesalpinia pulcherrima</i> (L.) Sw.             | 28                        | 1.35                   | 0.44                    | no info      |
|                | <i>Cassia fistula</i> L.                            | 32                        | 1.76                   | 0.28                    | no info      |

| Family        | Plant Species                                  | Frequency<br>(# of plots) | Pollinator<br>Richness | Pollinator<br>Abundance | Distribution |
|---------------|------------------------------------------------|---------------------------|------------------------|-------------------------|--------------|
|               | <i>Cassia surattensis</i> Burm.f.              | 5                         | 1.80                   | 0.20                    | no info      |
|               | <i>Clitoria ternatea</i> L.                    | 1                         | 0.00                   | 0.00                    | no info      |
|               | <i>Delonix regia</i> (Hook.) Raf.              | 7                         | 1.11                   | 0.24                    | exotic       |
|               | <i>Erythrina variegata</i> L.                  | 1                         | 2.00                   | 1.27                    | no info      |
|               | <i>Gliricidia sepium</i> (Jacq.) Walp.         | 1                         | 3.00                   | 0.03                    | no info      |
|               | <i>Leucaena leucocephala</i> (Lam.) de Wit     | 2                         | 0.00                   | 0.00                    | no info      |
|               | <i>Parkinsonia aculeata</i> L.                 | 1                         | 3.00                   | 2.75                    | no info      |
|               | <i>Peltophorum pterocarpum</i> (DC.) K.Heyne   | 19                        | 4.17                   | 0.56                    | no info      |
|               | <i>Pterocarpus indicus</i> Willd.              | 5                         | 1.40                   | 0.02                    | no info      |
|               | <i>Saraca asoca</i> (Roxb.) Willd.             | 2                         | 0.00                   | 0.00                    | no info      |
|               | <i>Saraca indica</i> L.                        | 2                         | 1.50                   | 0.03                    | no info      |
|               | <i>Senna siamea</i> (Lam.) H.S.Irwin & Barneby | 3                         | 1.00                   | 0.09                    | no info      |
|               | <i>Sesbania grandiflora</i> (L.) Pers.         | 1                         | 0.00                   | 0.00                    | no info      |
|               | <i>Tamarindus indica</i> L.                    | 1                         | 3.00                   | 0.83                    | no info      |
| Linderniaceae | <i>Torenia fournieri</i> Linden ex E. Fourn.   | 1                         | NA                     | NA                      | native       |
| Lythraceae    | <i>Lagerstroemia calyculata</i> Kurz           | 1                         | 3.00                   | 0.21                    | native       |
|               | <i>Lagerstroemia indica</i> L.                 | 6                         | 1.60                   | 0.39                    | native       |
|               | <i>Lagerstroemia</i> sp.                       | 1                         | 1.00                   | 0.33                    | native       |
|               | <i>Lagerstroemia speciosa</i> (L.) Pers.       | 17                        | 2.31                   | 0.69                    | no info      |
|               | <i>Lagerstroemia tomentosa</i> C. Presl        | 3                         | 2.67                   | 1.26                    | native       |
|               | <i>Lagerstroemia</i> hybrid                    | 1                         | 1.00                   | 0.35                    | native       |
| Malpighiaceae | <i>Galphimia glauca</i> Cav.                   | 1                         | 1.00                   | 0.00                    | exotic       |
|               | <i>Malpighia coccigera</i> L.                  | 1                         | 2.00                   | 0.10                    | exotic       |
| Malvaceae     | <i>Alcea rosea</i> L.                          | 1                         | 0.00                   | 0.00                    | exotic       |
|               | <i>Dombeya elegans</i> Cordem.                 | 1                         | 2.00                   | 0.12                    | no info      |
|               | <i>Hibiscus rosa-sinensis</i> L.               | 5                         | 0.00                   | 0.00                    | exotic       |
|               | <i>Thespesia populnea</i> (L.) Sol. ex Corrêa  | 1                         | 1.00                   | 0.83                    | native       |
| Marantaceae   | <i>Thalia geniculata</i> L.                    | 1                         | 1.00                   | 0.03                    | exotic       |
| Moringaceae   | <i>Moringa oleifera</i> Lam.                   | 2                         | 0.50                   | 0.20                    | exotic       |

| Family         | Plant Species                                         | Frequency<br>(# of plots) | Pollinator<br>Richness | Pollinator<br>Abundance | Distribution |
|----------------|-------------------------------------------------------|---------------------------|------------------------|-------------------------|--------------|
| Muntingiaceae  | <i>Muntingia calabura</i> L.                          | 3                         | 2.00                   | 1.86                    | exotic       |
| Musaceae       | <i>Musa paradisiaca</i> L.                            | 3                         | 1.33                   | 1.61                    | native       |
|                | <i>Musa rubra</i> Wall. ex Kurz                       | 1                         | 1.00                   | 1.50                    | native       |
| Myrtaceae      | <i>Callistemon viminalis</i> (Sol. ex Gaertn.) G.Don  | 2                         | 3.00                   | 0.37                    | exotic       |
|                | <i>Syzygium jambos</i> (L.) Alston                    | 2                         | 4.00                   | 2.93                    | exotic       |
|                | <i>Syzygium malaccense</i> (L.) Merr. & L.M.Perry     | 1                         | 0.00                   | 0.00                    | native       |
|                | <i>Xanthostemon chrysanthus</i> (F.Muell.) Benth.     | 5                         | 1.80                   | 0.39                    | exotic       |
| Nelumbonaceae  | <i>Nelumbo nucifera</i> Gaertn.                       | 4                         | 2.00                   | 9.75                    | exotic       |
| Nyctaginaceae  | <i>Bougainvillea</i> spp.                             | 6                         | 0.00                   | 0.00                    | exotic       |
| Nymphaeaceae   | <i>Nymphaea lotus</i> L.                              | 3                         | 1.00                   | 6.14                    | native       |
|                | <i>Nymphaea nouchali</i> Burm.f.                      | 7                         | 2.00                   | 10.10                   | native       |
| Oxalidaceae    | <i>Averrhoa carambola</i> L.                          | 1                         | 3.00                   | 0.03                    | exotic       |
| Passifloraceae | <i>Turnera ulmifolia</i> L.                           | 5                         | 2.33                   | 0.53                    | exotic       |
| Plantaginaceae | <i>Angelonia goyazensis</i> Benth.                    | 2                         | 1.00                   | 0.11                    | exotic       |
|                | <i>Russelia equisetiformis</i> Schlttdl. & Cham.      | 2                         | 0.00                   | 0.00                    | exotic       |
| Poaceae        | <i>Oryza</i> sp.                                      | 1                         | NA                     | NA                      | -            |
|                | Poaceae spp.                                          | 2                         | NA                     | NA                      | -            |
|                | <i>Zoysia japonica</i> Steud.                         | 7                         | 2.33                   | 0.13                    | exotic       |
| Portulacaceae  | <i>Portulaca oleracea</i> L.                          | 4                         | 2.00                   | 0.59                    | native       |
| Rosaceae       | <i>Rosa</i> sp.                                       | 1                         | NA                     | NA                      | -            |
| Rubiaceae      | <i>Arachnothryx leucophylla</i> (Kunth) Planch.       | 1                         | NA                     | NA                      | exotic       |
|                | <i>Ixora coccinea</i> L.                              | 6                         | 0.67                   | 0.06                    | native       |
|                | <i>Ixora finlaysonianana</i> Wall. ex G.Don           | 2                         | 1.00                   | 0.45                    | no info      |
|                | <i>Ixora</i> sp.                                      | 1                         | 2.00                   | 0.04                    | -            |
|                | <i>Morinda citrifolia</i> L.                          | 1                         | 3.00                   | 0.24                    | native       |
|                | <i>Tamilnadia uliginosa</i> (Retz.) Tirveng. & Sastre | 1                         | 0.00                   | 0.00                    | native       |
| Rutaceae       | <i>Citrus maxima</i> (Burm.) Merr.                    | 1                         | 5.00                   | 3.67                    | exotic       |
|                | <i>Murraya paniculata</i> (L.) Jack                   | 6                         | 1.83                   | 0.52                    | native       |
| Sapindaceae    | <i>Lepisanthes fruticosa</i> (Roxb.) Leenh.           | 1                         | NA                     | NA                      | native       |

| <b>Family</b>    | <b>Plant Species</b>                | <b>Frequency<br/>(# of plots)</b> | <b>Pollinator<br/>Richness</b> | <b>Pollinator<br/>Abundance</b> | <b>Distribution</b> |
|------------------|-------------------------------------|-----------------------------------|--------------------------------|---------------------------------|---------------------|
| Sapotaceae       | <i>Mimusops elengi</i> L.           | 5                                 | 3.00                           | 0.84                            | native              |
| Scrophulariaceae | <i>Buddleja paniculata</i> Wall.    | 2                                 | 4.50                           | 0.01                            | native              |
| Verbenaceae      | <i>Citharexylum spinosum</i> L.     | 1                                 | 3.00                           | 0.03                            | exotic              |
|                  | <i>Duranta erecta</i> L.            | 2                                 | 0.50                           | 0.00                            | exotic              |
|                  | <i>Lantana camara</i> L.            | 3                                 | 1.00                           | 0.02                            | exotic              |
| Vitaceae         | <i>Cayratia trifolia</i> (L.) Domin | 1                                 | 0.00                           | 0.00                            | native              |
| -                | Unknown 1                           | 1                                 | 1.00                           | 0.25                            | -                   |
| -                | Unknown 6                           | 1                                 | 3.00                           | 0.58                            | -                   |
| -                | Unknown 11                          | 1                                 | 1.00                           | 0.00                            | -                   |
| -                | Unknown 13                          | 1                                 | 2.00                           | 0.00                            | -                   |
| -                | Unknown 15                          | 1                                 | NA                             | NA                              | -                   |
