# Supplementary material for: Habitat and landscape factors influence pollinators in a tropical megacity, Bangkok, Thailand
Source: PubMed Central journal article supplement (PMC6055598; doi:10.7717/peerj.5335), 2018-07-20
Supplement: peerj-06-5335-s006.pdf [file peerj-06-5335-s006.pdf]

## Habitat and landscape factors influence pollinators in a tropical megacity, Bangkok, Thailand

**Supplemental Table S3.** Detailed information about each of the pollinator taxa observed in this study. Taxa are sorted numerically by “Order” (highest to lowest percentage), then alphabetically by “Family”, then numerically by “Frequency”. The frequencies of some taxa are unknown, as they were only identified to genus or family in the field, and were later identified to species or genus in the lab based on collected or photographed specimens. The nine most common taxa are highlighted in yellow. Distribution information was obtained from the Catalogue of Life website (<http://www.catalogueoflife.org>; accessed May 2018). All pollinator taxa that could be sufficiently identified are native to Thailand.

| Order                  | Family               | Genus                                   | Frequency<br>(# of individuals) | Percent | Distribution |
|------------------------|----------------------|-----------------------------------------|---------------------------------|---------|--------------|
| Hymenoptera<br>(98.6%) | Apidae               | <i>Tetragonula</i> spp.                 | 12,087                          | 64.317  | native       |
|                        |                      | <i>Apis florea</i> Fabricius, 1787      | 2,441                           | 12.989  | native       |
|                        |                      | <i>Apis cerana</i> Fabricius, 1793      | 2,345                           | 12.478  | native       |
|                        |                      | <i>Apis dorsata</i> Fabricius, 1793     | 1,148                           | 6.109   | native       |
|                        |                      | <i>Xylocopa aestuans</i> Linnaeus, 1758 | 273                             | 1.453   | native       |
|                        |                      | <i>Xylocopa nasalis</i> Westwood, 1842  | 12                              | 0.064   | native       |
|                        |                      | <i>Ceratina</i> spp.                    | 9                               | 0.048   | -            |
|                        |                      | <i>Ceratina cognata</i> Smith, 1879     | (specimen)                      | -       | native       |
|                        |                      | <i>Ceratina dentipes</i> Friese, 1914   | (specimen)                      | -       | native       |
|                        | <i>Amegilla</i> spp. | 7                                       | 0.037                           | -       |              |
|                        | Crabronidae          | spp.                                    | 2                               | 0.011   | -            |
|                        | Eumenidae            | <i>Delta conoideum</i> Gmelin, 1790     | 32                              | 0.170   | native       |
|                        |                      | <i>Delta pyriforme</i> Fabricius, 1775  | 2                               | 0.011   | native       |
|                        |                      | <i>Polistes</i> spp.                    | 2                               | 0.011   | -            |
|                        | Halictidae           | <i>Lasioglossum</i> spp.                | 84                              | 0.447   | -            |
|                        |                      | <i>Nomia</i> spp.                       | 3                               | 0.016   | -            |
|                        | Megachilidae         | <i>Megachile</i> spp.                   | 30                              | 0.160   | -            |
|                        | Scoliidae            | <i>Campsomeris</i> spp.                 | 11                              | 0.059   | -            |
|                        |                      | spp.                                    | 6                               | 0.032   | -            |

|                                          |                |                                               |            |       |        |        |
|------------------------------------------|----------------|-----------------------------------------------|------------|-------|--------|--------|
|                                          | Unknown        | spp.                                          | 27         | 0.144 | -      |        |
|                                          | Vespidae       | spp.                                          | 15         | 0.080 | -      |        |
|                                          |                | <i>Ropalidia</i> spp.                         | (specimen) | -     | -      |        |
| Lepidoptera<br>(1.16%)                   | Hesperiidae    | spp.                                          | 1          | 0.005 | -      |        |
|                                          | Lycaenidae     | spp.                                          | 57         | 0.303 | -      |        |
|                                          |                | <i>Chilades pandava</i> Horsfield, 1829       |            | 14    | 0.074  | native |
|                                          | Nymphalidae    | <i>Danaus chrysippus</i> Linnaeus, 1758       |            | 54    | 0.287  | native |
|                                          |                | <i>Junonia lemonias</i> Linnaeus, 1758        |            | 14    | 0.074  | native |
|                                          |                | <i>Ideopsis similis</i> Linnaeus, 1758        |            | 2     | 0.011  | native |
|                                          | Papilionidae   | <i>Graphium doson</i> (Felder & Felder, 1864) |            | 5     | 0.027  | native |
|                                          | Pieridae       | <i>Delias eucharis</i> Drury, 1773            |            | 43    | 0.229  | native |
| <i>Catopsilia Pomona</i> Fabricius, 1775 |                |                                               | 17         | 0.090 | native |        |
|                                          | Unknown        | spp.                                          | 11         | 0.059 | -      |        |
| Diptera<br>(0.15%)                       | Sacrophagidae  | spp.                                          | 2          | 0.011 | -      |        |
|                                          | Syrphidae      | spp.                                          | 20         | 0.106 | -      |        |
|                                          |                | <i>Eristalinus arvorum</i> Fabricius, 1787    | (specimen) | -     | -      | native |
|                                          | Unknown        | spp.                                          | 6          | 0.032 | -      |        |
| Coleoptera<br>(0.032%)                   | Chrysomelidae  | sp.                                           | 1          | 0.005 | -      |        |
|                                          | Curculionoidea | spp.                                          | 5          | 0.027 | -      |        |
| Hemiptera<br>(0.021%)                    | Lygaeidae      | spp.                                          | 4          | 0.021 | -      |        |
| Passeriformes<br>(0.005%)                | Nectariniidae  | <i>Cinnyris jugularis</i> Linnaeus, 1766      | 1          | 0.005 | native |        |
