# Supplementary material for: Habitat and landscape factors influence pollinators in a tropical megacity, Bangkok, Thailand
Source: PubMed Central journal article supplement (PMC6055598; doi:10.7717/peerj.5335), 2018-07-20
Supplement: peerj-06-5335-s007.pdf [file peerj-06-5335-s007.pdf]

## Habitat and landscape factors influence pollinators in a tropical megacity, Bangkok, Thailand

**Supplemental Table S4.** Details and results of the pollination network analysis.

**Table S4a.** Details and results of the pollinator taxa used in the pollination network. “Label” refers to the labels used for the pollinator taxa in the pollination network (Figure 3, S3). Degree refers to the number of floral hosts per pollinator taxa. Normalized degree is calculated as degree divided by the number of possible interacting partners, which accounts for differences in network size.

| Label | Pollinator taxa          | Degree | Normalized Degree |
|-------|--------------------------|--------|-------------------|
| A1    | <i>Tetragonula</i>       | 93     | 0.894231          |
| A2    | <i>Apis florea</i>       | 33     | 0.317308          |
| A3    | <i>Apis cerana</i>       | 42     | 0.403846          |
| A4    | <i>Apis dorsata</i>      | 17     | 0.163462          |
| A5    | <i>Xylocopa aestuans</i> | 19     | 0.182692          |
| A6    | <i>Xylocopa nasalis</i>  | 3      | 0.028846          |
| A7    | <i>Ceratina</i>          | 4      | 0.038462          |
| A8    | <i>Amegilla</i>          | 3      | 0.028846          |
| A9    | Crabronidae              | 1      | 0.009615          |
| A10   | <i>Delta</i>             | 3      | 0.028846          |
| A11   | <i>Polistes</i>          | 1      | 0.009615          |
| A12   | <i>Lasioglossum</i>      | 6      | 0.057692          |
| A13   | <i>Nomia</i>             | 1      | 0.009615          |
| A14   | <i>Megachile</i>         | 1      | 0.009615          |
| A15   | <i>Campsomeris</i>       | 4      | 0.038462          |
| A16   | Scoliidae                | 2      | 0.019231          |
| A17   | <i>Ropalidia</i>         | 2      | 0.019231          |
| A18   | Unknown Hymenoptera      | 11     | 0.105769          |
| A19   | <i>Catopsilia</i>        | 6      | 0.057692          |
| A20   | <i>Chilades</i>          | 2      | 0.019231          |
| A21   | <i>Danaus</i>            | 3      | 0.028846          |
| A22   | <i>Delias</i>            | 6      | 0.057692          |
| A23   | <i>Graphium</i>          | 1      | 0.009615          |
| A24   | <i>Ideopsis</i>          | 1      | 0.009615          |
| A25   | <i>Junonia</i>           | 2      | 0.019231          |
| A26   | Hesperiidae              | 1      | 0.009615          |
| A27   | Lycaenidae               | 6      | 0.057692          |
| A28   | Unknown Butterfly        | 5      | 0.048077          |
| A29   | Sacrophagidae            | 1      | 0.009615          |
| A30   | Syrphidae                | 3      | 0.028846          |
| A31   | Unknown Diptera          | 3      | 0.028846          |
| A32   | Coleoptera               | 2      | 0.019231          |
| A33   | Hemiptera                | 2      | 0.019231          |
| A34   | Sunbird                  | 1      | 0.009615          |

**Table S4b.** Details of the plant taxa used in the pollination network. “Label” refers to the labels used for the plant taxa in the pollination network (Figure 3, S3).

| <b>Label</b> | <b>Plant Species</b>                                 |
|--------------|------------------------------------------------------|
| P1           | <i>Adenium obesum</i> (Forssk.) Roem. & Schult.      |
| P2           | <i>Albizia saman</i> (Jacq.) Merr.                   |
| P3           | <i>Alcea rosea</i> L.                                |
| P4           | <i>Allamanda cathartica</i> L.                       |
| P5           | <i>Amaranthus viridis</i> L.                         |
| P6           | <i>Angelonia goyazensis</i> Benth.                   |
| P7           | <i>Asystasia gangetica</i> (L.) T.Anderson           |
| P8           | <i>Averrhoa carambola</i> L.                         |
| P9           | <i>Bauhinia acuminata</i> L.                         |
| P10          | <i>Bauhinia purpurea</i> L.                          |
| P11          | <i>Bougainvillea</i>                                 |
| P12          | <i>Buddleja paniculata</i> Wall.                     |
| P13          | <i>Caesalpinia pulcherrima</i> (L.) Sw.              |
| P14          | <i>Callistemon viminalis</i> (Sol. ex Gaertn.) G.Don |
| P15          | <i>Calophyllum inophyllum</i> L.                     |
| P16          | <i>Canna indica</i> L.                               |
| P17          | <i>Cascabela thevetia</i> (L.) Lippold               |
| P18          | <i>Cassia fistula</i> L.                             |
| P19          | <i>Cassia surattensis</i> Burm.f.                    |
| P20          | <i>Catharanthus roseus</i> (L.) G.Don                |
| P21          | <i>Cayratia trifolia</i> (L.) Domin                  |
| P22          | <i>Cerbera odollam</i> Gaertn.                       |
| P23          | <i>Cheilocostus speciosus</i> (J.Koenig) C.D.Specht  |
| P24          | <i>Citharexylum spinosum</i> L.                      |
| P25          | <i>Citrus maxima</i> (Burm.) Merr.                   |
| P26          | <i>Cleome spinosa</i> Jacq.                          |
| P27          | <i>Clerodendrum x speciosum</i>                      |
| P28          | <i>Clitoria ternatea</i> L.                          |
| P29          | <i>Coccinia grandis</i> (L.) Voigt                   |
| P30          | <i>Combretum indicum</i> (L.) DeFilipps              |
| P31          | <i>Cordia alba</i> (Jacq.) Roem. & Schult.           |
| P32          | <i>Cordia sebestena</i> L.                           |
| P33          | <i>Couroupita guianensis</i> Aubl.                   |
| P34          | <i>Crateva religiosa</i> G.Forst.                    |
| P35          | <i>Crinum asiaticum</i> L.                           |
| P36          | <i>Crossandra nilotica</i> Oliv.                     |

| <b>Label</b> | <b>Plant Species</b>                              |
|--------------|---------------------------------------------------|
| P37          | <i>Delonix regia</i> (Hook.) Raf.                 |
| P38          | <i>Dombeya elegans</i> Cordem.                    |
| P39          | <i>Duranta erecta</i> L.                          |
| P40          | <i>Echinodorus cordifolius</i> (L.) Griseb.       |
| P41          | <i>Ehretia microphylla</i> Lam.                   |
| P42          | <i>Erythrina variegata</i> L.                     |
| P43          | <i>Galphimia glauca</i> Cav.                      |
| P44          | <i>Gliricidia sepium</i> (Jacq.) Walp.            |
| P45          | <i>Gomphrena celosioides</i> Mart.                |
| P46          | <i>Gomphrena globosa</i> L.                       |
| P47          | <i>Graptophyllum pictum</i> (L.) Griff.           |
| P48          | <i>Gustavia gracillima</i> Miers                  |
| P49          | <i>Handroanthus chrysanthus</i> (Jacq.) S.O.Grose |
| P50          | <i>Helianthus annuus</i> L.                       |
| P51          | <i>Hibiscus rosa-sinensis</i> L.                  |
| P52          | <i>Hygrophila erecta</i> (Burm.f.) Hochr.         |
| P53          | <i>Hymenocallis littoralis</i> (Jacq.) Salisb.    |
| P54          | <i>Ipomoea aquatica</i> Forssk.                   |
| P55          | <i>Ipomoea carnea</i> Jacq.                       |
| P56          | <i>Ixora coccinea</i> L.                          |
| P57          | <i>Ixora finlaysoniana</i> Wall. ex G.Don         |
| P58          | <i>Ixora</i> sp.                                  |
| P59          | <i>Jatropha integerrima</i> Jacq.                 |
| P60          | <i>Jatropha multifida</i> L.                      |
| P61          | <i>Justicia betonica</i> L.                       |
| P62          | <i>Lagerstroemia calyculata</i> Kurz              |
| P63          | <i>Lagerstroemia indica</i> L.                    |
| P64          | <i>Lagerstroemia</i> sp.                          |
| P65          | <i>Lagerstroemia speciosa</i> (L.) Pers.          |
| P66          | <i>Lagerstroemia tomentosa</i> C. Presl           |
| P67          | <i>Lagerstroemia</i> hybrid                       |
| P68          | <i>Lantana camara</i> L.                          |
| P69          | <i>Leucaena leucocephala</i> (Lam.) de Wit        |
| P70          | <i>Luffa cylindrica</i> (L.) M.Roem.              |
| P71          | <i>Malpighia coccigera</i> L.                     |
| P72          | <i>Mangifera indica</i> L.                        |
| P73          | <i>Marsdenia floribunda</i> (Brongn.) Schltr.     |
| P74          | <i>Mimusops elengi</i> L.                         |
| P75          | <i>Morinda citrifolia</i> L.                      |

| <b>Label</b> | <b>Plant Species</b>                                            |
|--------------|-----------------------------------------------------------------|
| P76          | <i>Moringa oleifera</i> Lam.                                    |
| P77          | <i>Muntingia calabura</i> L.                                    |
| P78          | <i>Murraya paniculata</i> (L.) Jack                             |
| P79          | <i>Musa paradisiaca</i> L.                                      |
| P80          | <i>Musa rubra</i> Wall. ex Kurz                                 |
| P81          | <i>Nelumbo nucifera</i> Gaertn.                                 |
| P82          | <i>Nerium oleander</i> L.                                       |
| P83          | <i>Nymphaea lotus</i> L.                                        |
| P84          | <i>Nymphaea nouchali</i> Burm.f.                                |
| P85          | <i>Ocimum</i> × <i>africanum</i> Lour.                          |
| P86          | <i>Ocimum basilicum</i> L.                                      |
| P87          | <i>Ocimum tenuiflorum</i> L.                                    |
| P88          | <i>Parkinsonia aculeata</i> L.                                  |
| P89          | <i>Peltophorum pterocarpum</i> (DC.) K.Heyne                    |
| P90          | <i>Pluchea indica</i> (L.) Less.                                |
| P91          | <i>Plumeria</i> spp.                                            |
| P92          | <i>Portulaca oleracea</i> L.                                    |
| P93          | <i>Pseuderanthemum curtatum</i> (C. B. Cl.) Merrill             |
| P94          | <i>Pterocarpus indicus</i> Willd.                               |
| P95          | <i>Ruellia simplex</i> C.Wright                                 |
| P96          | <i>Russelia equisetiformis</i> Schltld. & Cham.                 |
| P97          | <i>Salvia farinacea</i> Benth.                                  |
| P98          | <i>Saraca asoca</i> (Roxb.) Willd.                              |
| P99          | <i>Saraca indica</i> L.                                         |
| P100         | <i>Senna siamea</i> (Lam.) H.S.Irwin & Barneby                  |
| P101         | <i>Sesbania grandiflora</i> (L.) Pers.                          |
| P102         | <i>Spathodea campanulata</i> P.Beauv.                           |
| P103         | <i>Syzygium jambos</i> (L.) Alston                              |
| P104         | <i>Syzygium malaccense</i> (L.) Merr. & L.M.Perry               |
| P105         | <i>Tabebuia aurea</i> (Silva Manso) Benth. & Hook.f. ex S.Moore |
| P106         | <i>Tabebuia rosea</i> (Bertol.) Bertero ex A.DC.                |
| P107         | <i>Tagetes erecta</i> L.                                        |
| P108         | <i>Tamarindus indica</i> L.                                     |
| P109         | <i>Tamilnadia uliginosa</i> (Retz.) Tirveng. & Sastre           |
| P110         | <i>Tecoma stans</i> (L.) Juss. ex Kunth                         |
| P111         | <i>Thalia geniculata</i> L.                                     |
| P112         | <i>Thespesia populnea</i> (L.) Sol. ex Corrêa                   |
| P113         | <i>Thunbergia grandiflora</i> (Roxb. ex Rottl.) Roxb.           |
| P114         | <i>Thunbergia laurifolia</i> Lindl.                             |

| <b>Label</b> | <b>Plant Species</b>                                       |
|--------------|------------------------------------------------------------|
| P115         | <i>Turnera ulmifolia</i> L.                                |
| P116         | Unknown                                                    |
| P117         | Unknown11                                                  |
| P118         | Unknown13                                                  |
| P119         | Unknown6                                                   |
| P120         | <i>Vitex negundo</i> L.                                    |
| P121         | <i>Wrightia religiosa</i> (Teijsm. & Binn.) Benth. ex Kurz |
| P122         | <i>Xanthostemon chrysanthus</i> (F.Muell.) Benth.          |
| P123         | <i>Zephyranthes minuta</i> (Kunth) D.Dietr.                |
| P124         | <i>Zoysia japonica</i> Steud.                              |
