# Supplementary material for: Habitat and landscape factors influence pollinators in a tropical megacity, Bangkok, Thailand
Source: PeerJ journal article supplement (doi:10.7717/peerj.5335), 2018-07-20
Supplement: Supplemental_Table_S5_native_exotic.pdf [file Supplemental_Table_S5_native_exotic.pdf]

## Habitat and landscape factors influence pollinators in a tropical megacity, Bangkok, Thailand

**Supplemental Table S4.** Results from t-test analyses comparing pollinator richness and pollinator abundances at native and exotic plant species. None of our pollinator metrics showed a significant preference for one over the other.

|                                            | Native average | Exotic average | <i>t</i> -value | df | <i>P</i> |
|--------------------------------------------|----------------|----------------|-----------------|----|----------|
| Total pollinator abundance                 | 1.016          | 1.131          | 0.22            | 93 | 0.8      |
| Total pollinator richness                  | 1.657          | 1.472          | 0.79            | 86 | 0.4      |
| <i>Tetragonula</i> stingless bee abundance | 30.45          | 19.87          | 1.2             | 45 | 0.2      |
| <i>Apis</i> honey bee abundance            | 9.213          | 15.979         | 1.3             | 92 | 0.2      |
| <i>A. cerana</i> abundance                 | 5.20           | 3.95           | 0.43            | 50 | 0.7      |
| <i>A. dorsata</i> abundance                | 0.8509         | 3.868          | 1.4             | 62 | 0.2      |
| <i>A. florea</i> abundance                 | 3.162          | 8.161          | 1.5             | 69 | 0.1      |
| <i>Xylocopa</i> carpenter bee abundance    | 0.5263         | 0.4200         | 0.3             | 76 | 0.8      |
| Butterfly abundance                        | 1.259          | 3.355          | 0.66            | 69 | 0.5      |
